# Supplementary material
Source: publisher figshare collection journal article supplement (https://sage.figshare.com/ndownloader/files/23727629)
Supplement: Supplementary file 1 [file 23727629]

## Reliability results

The two coders coded twelve questions, which overall had 96 units of text. Coders agreed on 88 . Table 1 shows reliability results per question, and per codes within questions. In 8 questions, coders agreed in all units, and thus the obtained kappa per question was 1. All codes included in these questions had a kappa = 1 and coder's accuracy = .99. For the remaining 4 questions, kappa ranged from 0.64 to 0.87. Regarding the codes included in these 4 questions, 12 codes had kappa = 1 and coder's accuracy = .99. For 6 codes, kappa ranged from 0.5 to 0.77, and coders' accuracy ranged from 0.85-0.9 to above 0.99. Results for all codes can be found in S2. Table.

**Table 1. Reliability results per question and codes within questions**

| Question/Code                                                                                                                                                                                                                                               | Kappa | Estimated Accuracy   |
|-------------------------------------------------------------------------------------------------------------------------------------------------------------------------------------------------------------------------------------------------------------|-------|----------------------|
| <i><b>Question 2:</b> Which objects do you put (or have you put) in your mouth? Again, by mouth we mean any of its components, that is, lips, tongue, teeth, gums; or a combination of these components, for example lips and teeth or tongue and gums.</i> | 0.64  | ---                  |
| <b>Code 2a:</b> To determine a small feature in object                                                                                                                                                                                                      | 0.5   | between 0.85 and 0.9 |
| <b>Code 2b:</b> To determine something about an object (including food) based on its taste                                                                                                                                                                  | 1     | above .99            |
| <b>Code 2c:</b> To determine something about an object (including food) based on its texture                                                                                                                                                                | 0.5   | between 0.85 and 0.9 |
| <i><b>Question C1:</b> Besides the objects you mentioned do you ever explore with your mouth household objects?</i>                                                                                                                                         | 1     | ---                  |
| <b>Code C1a:</b> To differentiate between similar objects                                                                                                                                                                                                   | 1     | 0.99                 |
| <b>Code C1b:</b> To determine a small feature in object                                                                                                                                                                                                     | 1     | 0.99                 |
| <b>Code C1c:</b> To determine something about an object (including food) based on its taste                                                                                                                                                                 | 1     | 0.99                 |
| <b>Code C1d:</b> To keep track of object's location                                                                                                                                                                                                         | 1     | 0.99                 |
| <i><b>Question C2:</b> Besides the objects you mentioned do you ever explore with your mouth objects at work?</i>                                                                                                                                           | 1     | ---                  |
| <b>Code C2a:</b> To differentiate between similar objects                                                                                                                                                                                                   | 1     | 0.99                 |
| <b>Code C2b:</b> To determine small feature in object                                                                                                                                                                                                       | 1     | 0.99                 |

|                                                                                                                                                                               |       |                       |
|-------------------------------------------------------------------------------------------------------------------------------------------------------------------------------|-------|-----------------------|
| <b>Code C2c:</b> To keep track of object's location                                                                                                                           | 1     | 0.99                  |
| <i><b>Question C3:</b> Besides the objects you mentioned do you ever explore with your mouth when out in the community</i>                                                    | N/A   | N/A                   |
| <b>Code C3:</b> To differentiate between similar objects                                                                                                                      | N/A   | N/A                   |
| <i><b>Question C4:</b> Besides the objects you mentioned do you ever explore with your mouth unfamiliar or new objects?</i>                                                   | 1     | 0.99                  |
| <b>Code C4a:</b> If I can't recognize an object with my hands, I use my mouth                                                                                                 | 1     | 0.99                  |
| <b>Code C4b:</b> To determine a small feature in object                                                                                                                       | 1     | 0.99                  |
| <b>Code C4c:</b> To determine something about an object (including food) based on its taste                                                                                   | 1     | 0.99                  |
| <i><b>Question3:</b> What features of the objects you mentioned do you perceive with your mouth. What do you learn about these objects by exploring them with your mouth?</i> | 0.75  | ---                   |
| <b>Code 3a:</b> To perceive an object by biting                                                                                                                               | 1     | above .99             |
| <b>Code 3b:</b> To differentiate between similar objects                                                                                                                      | -0.16 | less than 0.8         |
| <b>Code 3c:</b> To identify something about an object (including food) based on its shape                                                                                     | 1     | 0.99                  |
| <b>Code 3d:</b> To determine characteristics of own skin/body fluids                                                                                                          | 1     | 0.99                  |
| <b>Code 3e:</b> To determine a small feature in object                                                                                                                        | 1     | 0.99                  |
| <b>Code 3f:</b> To determine something about an object (including food) based on its taste                                                                                    | 0.625 | between 0.85 and 0.9  |
| <b>Code 3g:</b> To determine something about object (including food) based on its texture                                                                                     | 1     | between 0.95 and 0.99 |
| <b>Code 3h:</b> To determine the type of object based on thickness, width, or length                                                                                          | 1     | 0.99                  |
| <i><b>D1:</b> Besides the features you mentioned, do you think that by exploring objects with your mouth do you perceive texture?</i>                                         | N/A   | N/A                   |
| <b>Code D1:</b> To determine something about object (including food) based on its texture.                                                                                    | N/A   | N/A                   |
| <i><b>D2:</b> Besides the features you mentioned, do you think that by exploring objects with your mouth do you perceive temperature?</i>                                     | N/A   | N/A                   |
| <b>Code D2:</b> Different materials have different temperatures                                                                                                               | N/A   | N/A                   |
| <i><b>D3:</b> Besides the features you mentioned, do you think that by exploring objects with your mouth do you perceive the type of material the object is made off?</i>     | 1     | ---                   |
| <b>Code 3a:</b> To perceive an object by biting                                                                                                                               | 1     | 0.99                  |
| <b>Code 3b:</b> To differentiate between similar objects                                                                                                                      | 1     | 0.99                  |
| <b>Code 3c:</b> To determine something about an object (including food) based on its taste                                                                                    | 1     | 0.99                  |
| <i><b>D4:</b> Besides the features you mentioned, do you think that by exploring objects with your mouth do you perceive shape?</i>                                           | 1     | ---                   |
| <b>Code D4a:</b> To perceive an object by biting                                                                                                                              | 1     | 0.99                  |
| <b>Code D4b:</b> To differentiate between similar objects                                                                                                                     | 1     | 0.99                  |

|                                                                                                                                                                                                                     |      |                      |
|---------------------------------------------------------------------------------------------------------------------------------------------------------------------------------------------------------------------|------|----------------------|
| <b>D5:</b> Besides the features you mentioned, do you think that by exploring objects with your mouth do you perceive edges?                                                                                        | N/A  | N/A                  |
| <b>Code D5:</b> Sharp edges indicate bead is broken                                                                                                                                                                 | N/A  | N/A                  |
| <b>Question 4:</b> What is it about exploring an object with your mouth do you think leads to perceiving the object features you mentioned? How do you think using the mouth allows you to perceive those features? | 0.77 | ---                  |
| <b>Code 4a:</b> Mouthing correlates with higher attention                                                                                                                                                           | 0.6  | between 0.85 and 0.9 |
| <b>Code 4b:</b> Mouth confirms information from hands                                                                                                                                                               | 1    | 0.99                 |
| <b>Code 4c:</b> Mouth is more sensitive than fingertips                                                                                                                                                             | 0.77 | between 0.9 and 0.95 |
| <b>Code 4d:</b> Mouth sends signal to the brain                                                                                                                                                                     | 1    | 0.99                 |
| <b>Code 4e:</b> Mouth provides both touch and taste                                                                                                                                                                 | 0.71 | between 0.9 and 0.95 |
| <b>Question E1:</b> Besides what you mentioned, do you think the lips, and if so how, allow you to perceive the features you mentioned?                                                                             | 1    | ---                  |
| <b>Code E1a:</b> Mouthing correlates with higher attention                                                                                                                                                          | 1    | 0.99                 |
| <b>Code E1b:</b> Lips hold and move object                                                                                                                                                                          | 1    | 0.99                 |
| <b>Code E1c:</b> I perceive shape with lips                                                                                                                                                                         | 1    | 0.99                 |
| <b>Code E1d:</b> I perceive size with lips                                                                                                                                                                          | 1    | 0.99                 |
| <b>Code E1e:</b> I perceive temperature with lips                                                                                                                                                                   | 1    | 0.99                 |
| <b>Code E1f:</b> I perceive texture with lips                                                                                                                                                                       | 1    | 0.99                 |
| <b>Code E1g:</b> Mouth is more sensitive than fingertips                                                                                                                                                            | 1    | 0.99                 |
| <b>Code E1h:</b> To differentiate between similar objects                                                                                                                                                           | 1    | 0.99                 |
| <b>Code E1i:</b> To perceive an object by biting                                                                                                                                                                    | 1    | 0.99                 |
| <b>Question E2:</b> Besides what you mentioned, do you think the tongue, and if so how, allow you to perceive the features you mentioned?                                                                           | 1    | ---                  |
| <b>Code E2a:</b> To perceive small feature in object                                                                                                                                                                | 1    | 0.99                 |
| <b>Code E2b:</b> To determine something about an object (including food) based on its taste                                                                                                                         | 1    | 0.99                 |
| <b>Code E2c:</b> I perceive material with the tongue                                                                                                                                                                | 1    | 0.99                 |
| <b>Code E2d:</b> I perceive shape with the tongue                                                                                                                                                                   | 1    | 0.99                 |
| <b>Code E2e:</b> I perceive surface with the tongue                                                                                                                                                                 | 1    | 0.99                 |
| <b>Code E2f:</b> I perceive temperature with the tongue                                                                                                                                                             | 1    | 0.99                 |
| <b>Code E2g:</b> I perceive texture with the tongue                                                                                                                                                                 | 1    | 0.99                 |
| <b>Question E3:</b> Besides what you mentioned, do you think the teeth, and if so how, allow you to perceive the features you mentioned?                                                                            | 0.87 | ---                  |
| <b>Code E3a:</b> To perceive an object by biting                                                                                                                                                                    | 1    | 0.99                 |
| <b>Code E3b:</b> I perceive shape with the teeth                                                                                                                                                                    | 1    | 0.99                 |
| <b>Code E3c:</b> I perceive surface with the teeth                                                                                                                                                                  | 1    | 0.99                 |
| <b>Code E3d:</b> I perceive temperature with the teeth                                                                                                                                                              | 1    | 0.99                 |

|                                                                                                                                                               |     |      |
|---------------------------------------------------------------------------------------------------------------------------------------------------------------|-----|------|
| <b>Code E3e:</b> I perceive texture with the teeth                                                                                                            | 1   | 0.99 |
| <b>Code E3f:</b> I perceive thickness with the teeth                                                                                                          | 1   | 0.99 |
| <b>Question E5:</b> <i>Besides what you mentioned, do you think the movement of the jaw, and if so how, allow you to perceive the features you mentioned?</i> | N/A | N/A  |
| <b>Code E5:</b> To determine how many things are inside the mouth                                                                                             | N/A | N/A  |
| <b>Question E6:</b> <i>Besides what you mentioned, do you think the saliva, and if so how, allow you to perceive the features you mentioned?</i>              | 1   | ---  |
| <b>Code E6a:</b> Some objects produce more saliva                                                                                                             | 1   | 0.99 |
| <b>Code E6b:</b> Saliva helps to sense taste                                                                                                                  | 1   | 0.99 |

---: Calculation not applicable for more than 2 codes

N/A: question had only 1 possible code
